# Supplementary material for: Identification of Common Genes and Screening of Therapeutic Agents for Major Depressive Disorder and Alzheimer's Disease through Integrated Bioinformatics Approach
Source: Research Square preprint supplement (doi:10.21203/rs.3.rs-2232170/v1), 2022-11-11
Supplement: Supplementary file 1 [file 5d7733fd81b6a8fc2d7046b2.docx]

Supplementary table 2. Drugs in the upper 10 based on p-values

| Name | P-value | Chemical formula | Structure |
| --- | --- | --- | --- |
| aspirin | 0.000001627 | C9H8O4 | 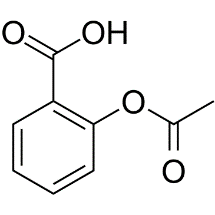 |
| Medroxyprogesterone acetate | 0.00002541 | C22H32O3 | 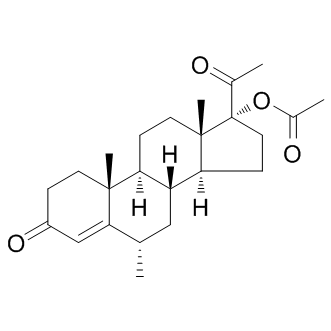 |
| p-Phenylenediamine | 0.00007927 | C6H8N2 | 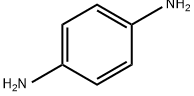 |
| COBALT | 0.0001418 | Co | 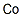 |
| Sodium dodecyl sulfate | 0.0001870 | C12H25NaO4S | 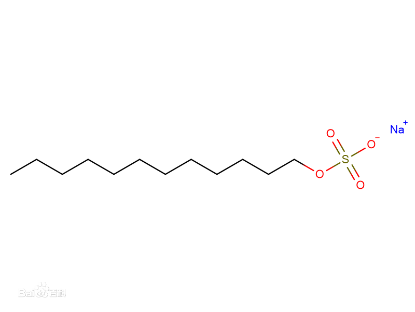 |
| Sodium dichromate | 0.0002869 | Na2Cr2O7 | 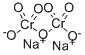 |
| AC1L1WKQ | 0.0003503 | — | — |
| 3,3'-Diindolylmethane | 0.0005523 | C17H14N2 | 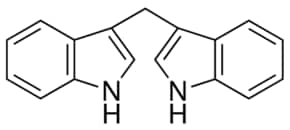 |
| enoxolone | 0.0006282 | C30H46O4 | 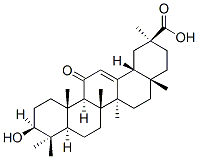 |
| MAGNESIUM | 0.0006822 | Mg | 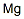 |
