# Supplementary material for: Identification of Common Genes and Screening of Therapeutic Agents for Major Depressive Disorder and Alzheimer's Disease through Integrated Bioinformatics Approach
Source: Research Square preprint supplement (doi:10.21203/rs.3.rs-2232170/v1), 2022-11-11
Supplement: Supplementary file 2 [file f9425f99de34a604b06beaf2.docx]

| Label | Degree | Betweenness | Chemical formula | Structure |
| --- | --- | --- | --- | --- |
| Aflatoxin B1 | 12 | 110.76 | C17H12O6 | 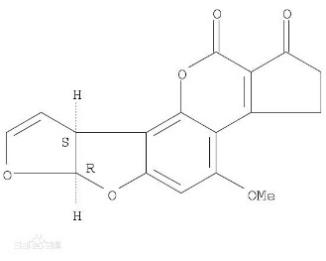 |
| Benzo(a)pyrene | 12 | 108.58 | C20H12 | 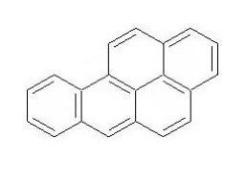 |
| Estradiol | 12 | 102.42 | C18H24O2 | 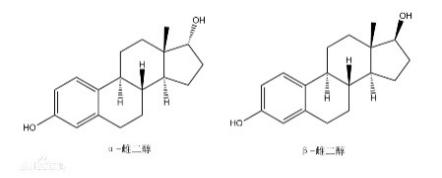 |
| Valproic Acid | 12 | 100.19 | C5H10O2 | 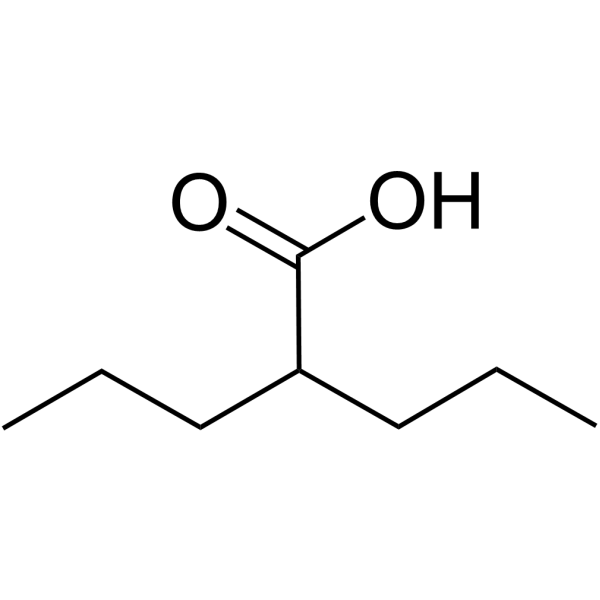 |
| Nickel | 11 | 112.8 | Ni | 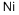 |
| Tetrachlorodibenzodioxin | 11 | 103.89 | C12H4Cl4O2 | 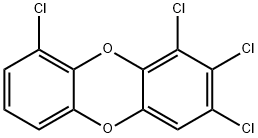 |
| Cyclosporine | 11 | 82.47 | C62H111N11O12 | 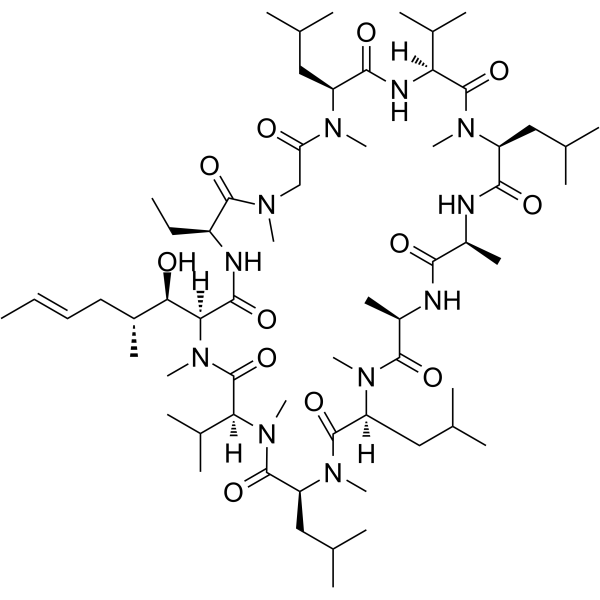 |
| Silicon Dioxide | 10 | 67.27 | SiO2 | 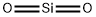 |
| Antirheumatic Agents | 10 | 66.06 |  | — |
| Copper Sulfate | 10 | 65.38 | CuSO₄ | 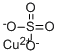 |

Supplementary table1.Top 10 chemicals that interacted most tightly with common DEGs
